# Supplementary material for: Multi-omics Approaches to Deciphering a Hypervirulent Strain of Campylobacter jejuni
Source: Genome Biol Evol. 2013 Nov 6;5(11):2217–30. doi: 10.1093/gbe/evt172 (PMC3845652; doi:10.1093/gbe/evt172)
Supplement: Supplementary Data [file supp_evt172_Supplemental_material.pdf]

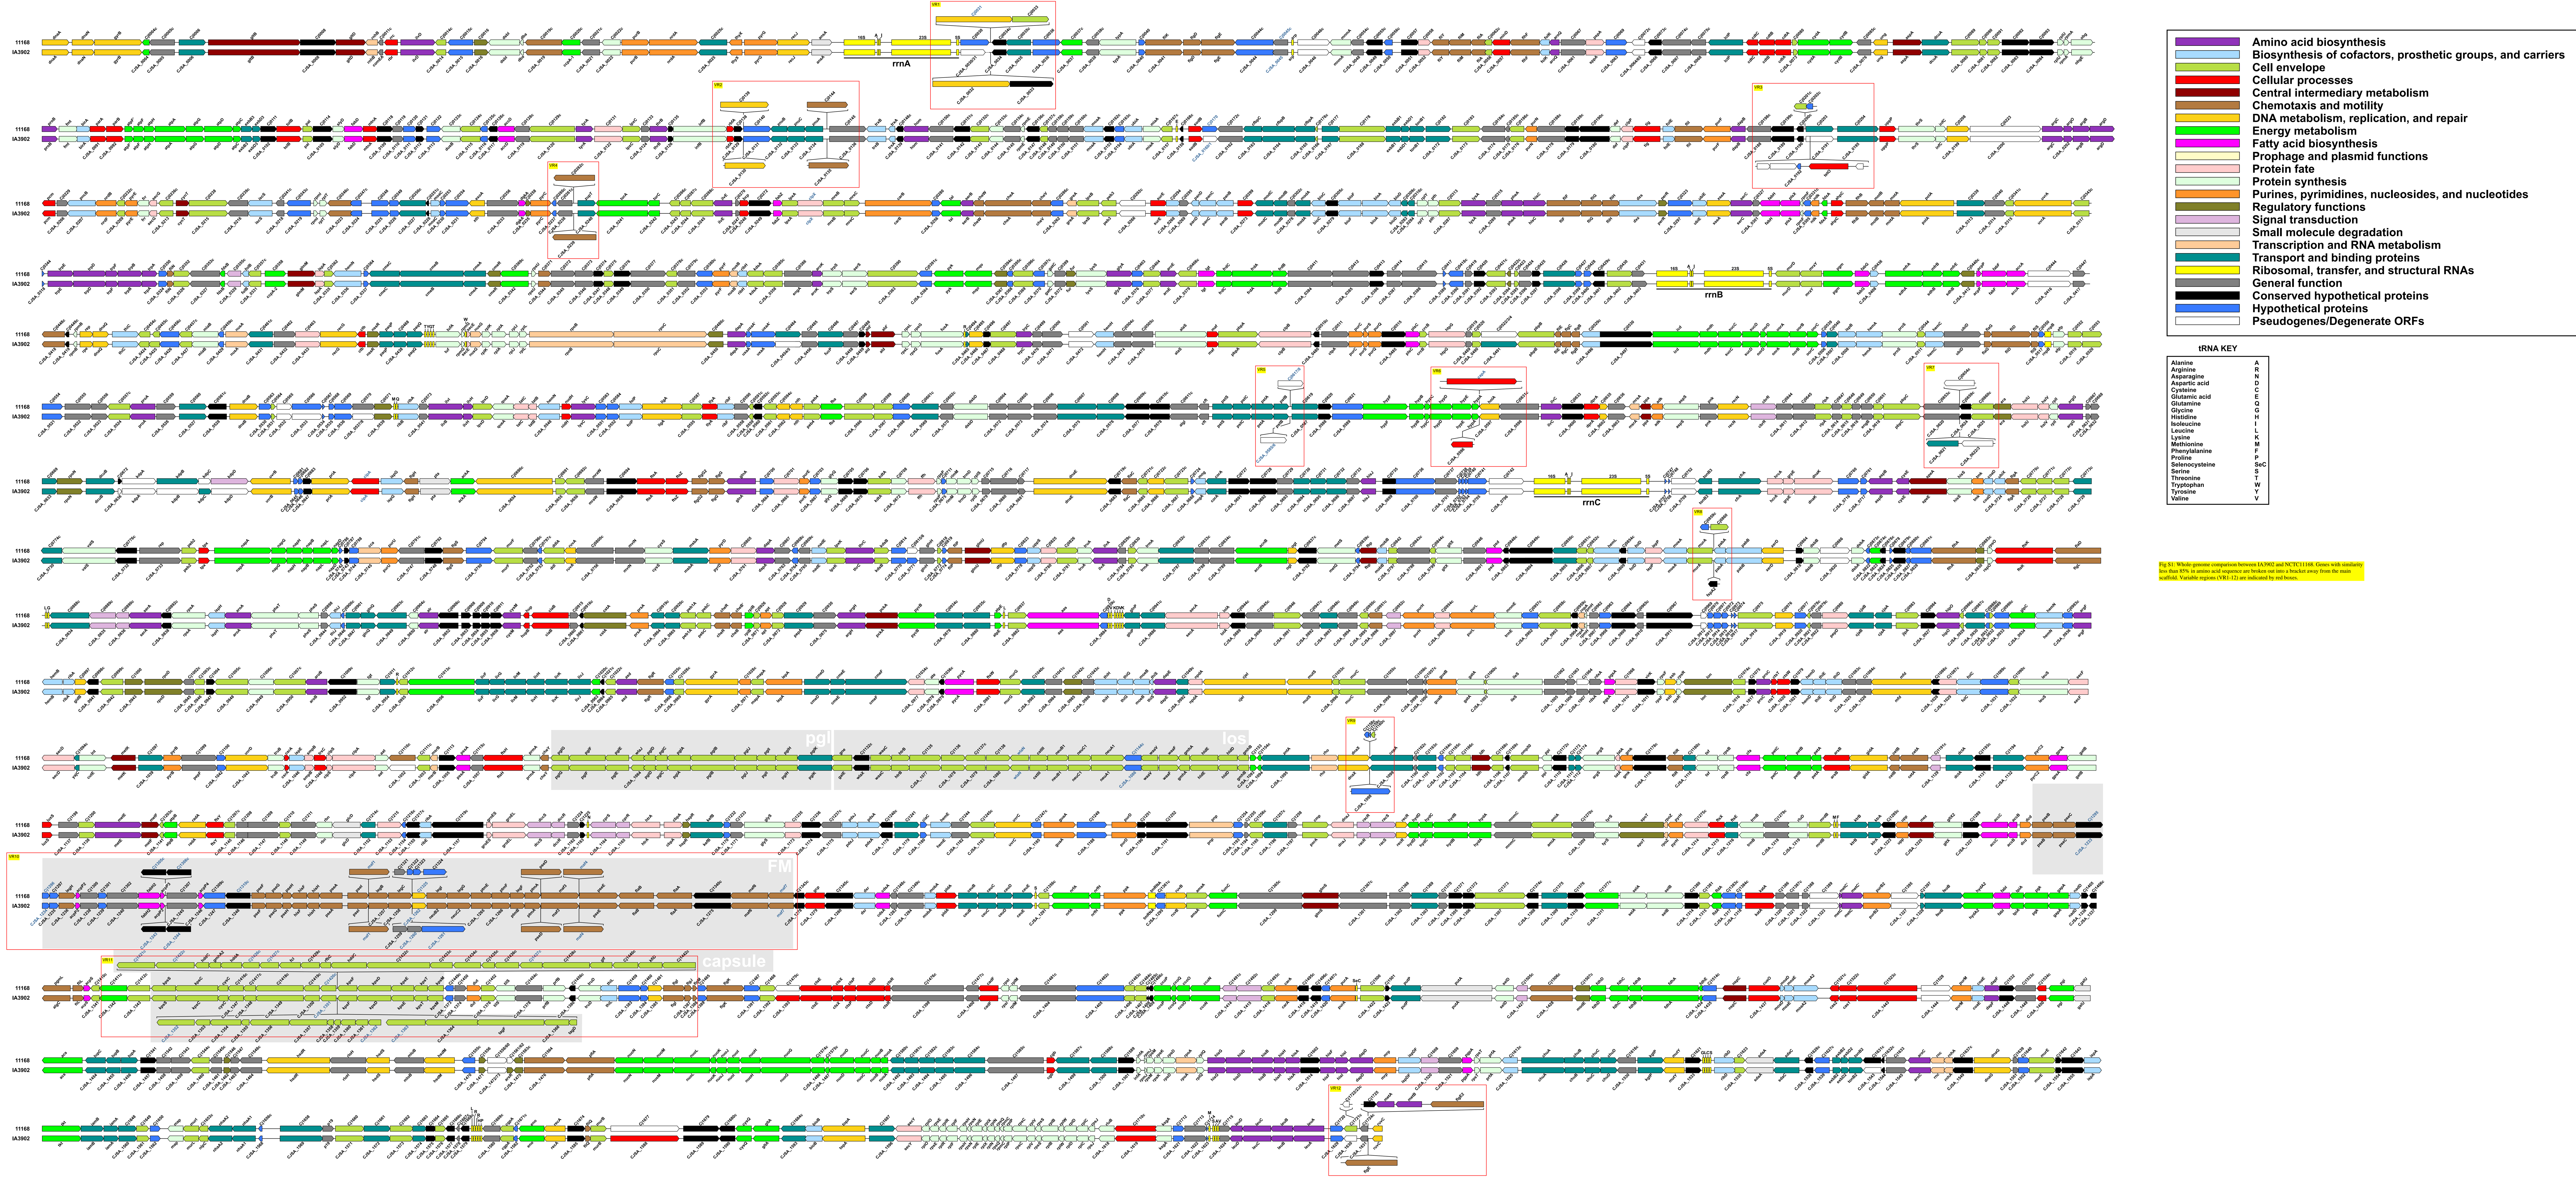

Fig S1. Whole-genome comparison between IA3902 and NCTC1168. Genes with similarity less than 85% in amino acid sequence are broken out into a bracket away from the main scaffold. Variable regions (VR1-12) are indicated by red boxes.

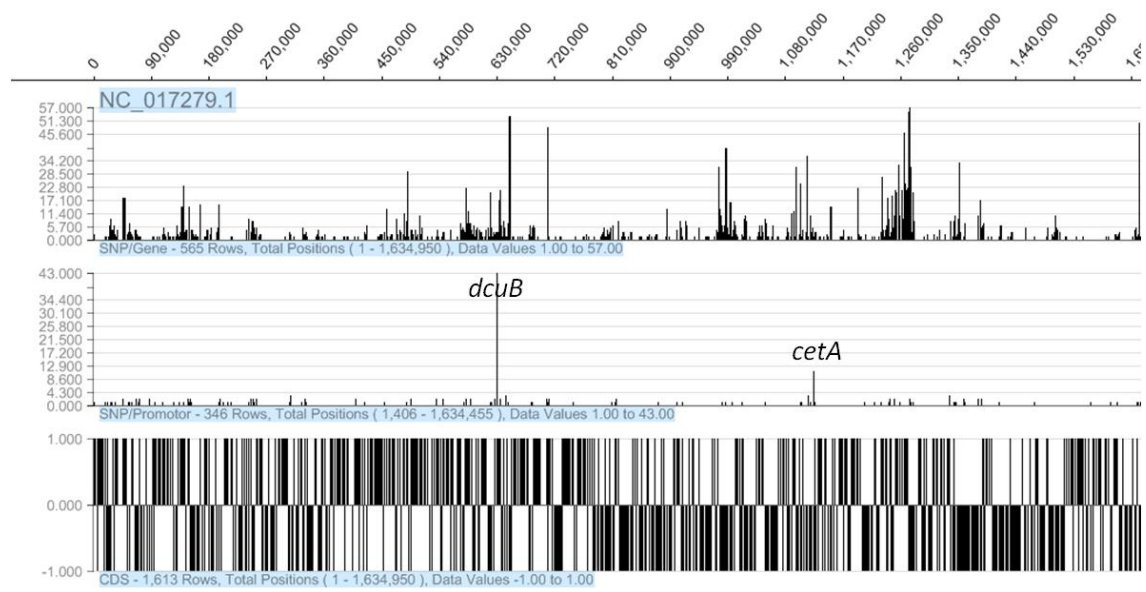

**A**

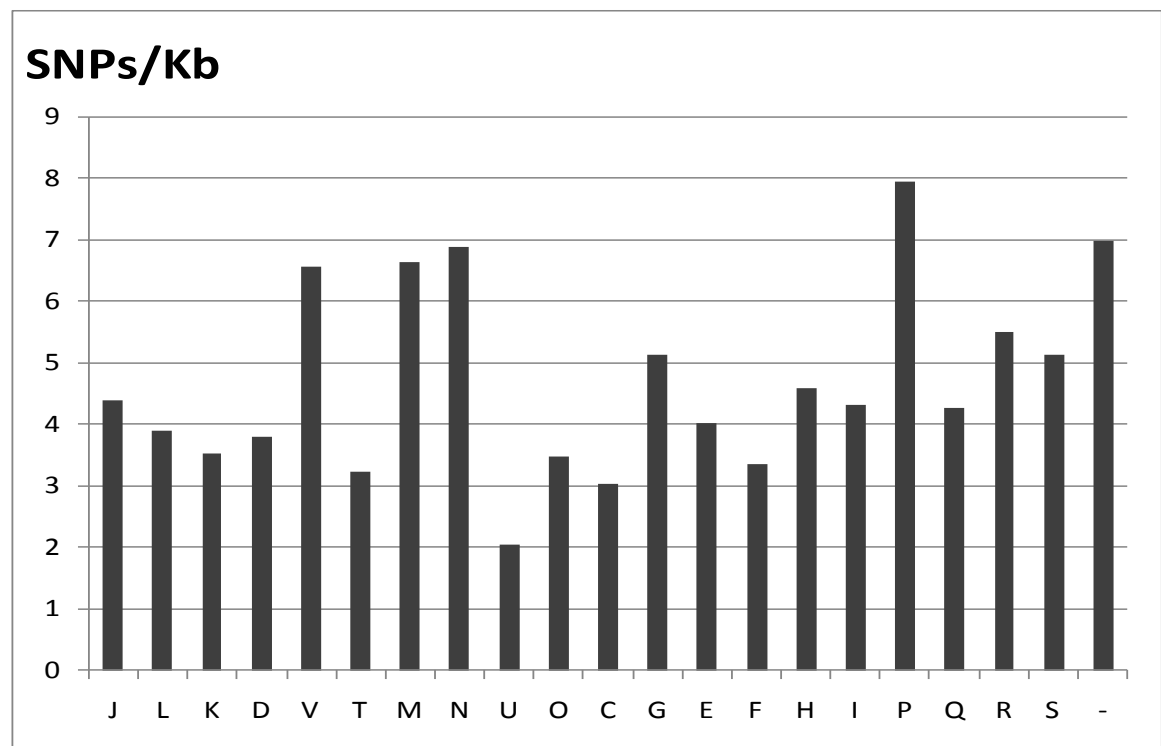

**B**

**Fig S2.** (A) The distribution of SNPs between the genomes of *C. jejuni* IA3902 and NCTC11168. The first track shows the nonsynonymous SNPs for each gene. The second track shows the intergenic SNPs for promoter region of each gene. The third track depicts the CDSs of IA3902. (B) The average numbers of nonsynonymous SNPs per Kb for each gene in different COG categories. COG category codes: J, Translation;

L, Replication, recombination and repair; K, Transcription; D, Cell cycle control, mitosis and meiosis; V, Defense mechanisms; T, Signal transduction mechanisms; M, Cell wall/membrane biogenesis; N, Cell motility; U, Intracellular trafficking and secretion; O, Posttranslational modification, protein turnover, chaperones; C, Energy production and conversion; G, Carbohydrate transport and metabolism; E, Amino acid transport and metabolism; F, Nucleotide transport and metabolism; H, Coenzyme transport and metabolism; I, Lipid transport and metabolism; P, Inorganic ion transport and metabolism; Q, Secondary metabolites biosynthesis, transport and catabolism; R, General function prediction only; S, Function unknown; and -, Not in COGs.

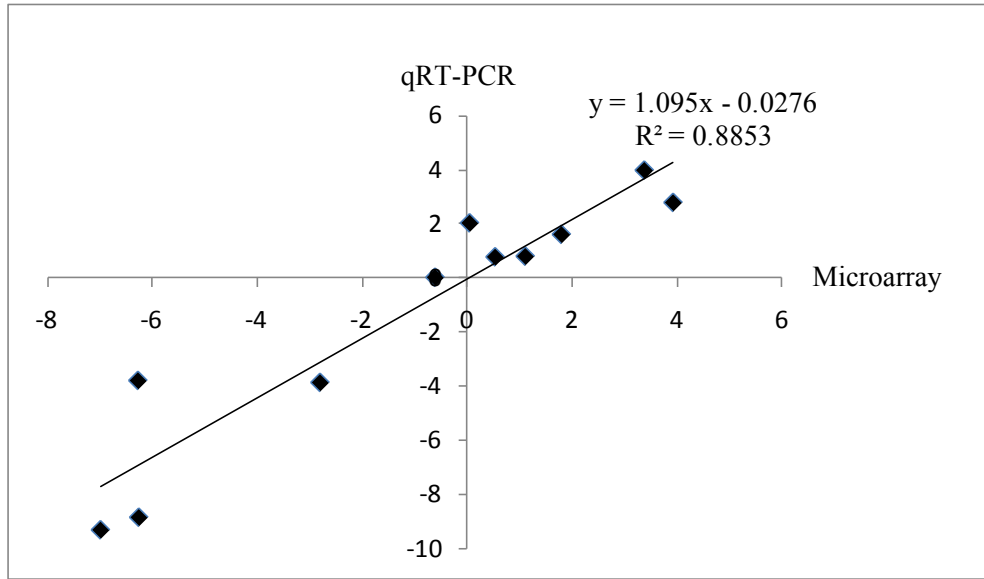

**Fig. S3.** Validation of microarray data using quantitative real-time RT-PCR. The transcriptional levels for the selected 11 genes were determined by quantitative real-time RT-PCR. Four up-regulated genes, four down-regulated genes and three genes that did not show significant variation in the microarray experiments are presented. Mean log<sub>2</sub> ratios obtained in qRT-PCR experiments are plotted against the mean log<sub>2</sub> ratios obtained with the microarrays. The high correlation coefficient values ( $R^2$ ) indicated that the microarray data was highly reliable in this study.

**Table S1.** Sequencing and assembly statistics of *C. jejuni* IA3902 provided by 454 Life Sciences

|                                     |                |
|-------------------------------------|----------------|
| Total number of reads               | 361,002        |
| Total number of bases               | 101,279,741    |
| Average read length                 | 280.6          |
| No. of total bases in all contigs   | 1,651,980      |
| No. of total bases in large contigs | 1,650,004      |
| No. of all contigs                  | 37             |
| No. of large contigs                | 30             |
| Size (bp) of large contigs          | 518 to 481,571 |
| Size (bp) of small contigs          | 122 to 365     |
| N50 contig size <sup>a</sup>        | 182,457        |
| Q40+bases <sup>b</sup>              | 1,649,311      |
| Average coverage depth fold         | 55.7           |

<sup>a</sup>The N50 size is the length such that 50% of the assembled genome lies in contigs of N50 size or longer

<sup>b</sup>Q40+ bases: This is all the bases in the assembled contigs that carry a phred-equivalent quality score of 40 and above. A score of 40 is equivalent to an error rate of  $10^{-4}$ , or an accuracy of 99.99%.

**Table S2.** General and Genome properties of *C. jejuni* IA3902

|                        |                                                                                                                    |                |
|------------------------|--------------------------------------------------------------------------------------------------------------------|----------------|
| <b>General</b>         |                                                                                                                    |                |
| Serotype               | HS:1,8                                                                                                             |                |
| MLST                   | ST-8/CC-21                                                                                                         |                |
| PFGE                   | DBRS16.008/DBRK02.0028                                                                                             |                |
| FlaA SVR               | Allele type 122/peptide type 4                                                                                     |                |
| Susceptibility pattern | Tet <sup>R</sup> , Pen <sup>R</sup> , Enr <sup>S</sup> , Tyl <sup>S</sup> , Flor <sup>S</sup> , Kan <sup>S</sup> , |                |
| <b>Genome</b>          | <b>chromosome</b>                                                                                                  | <b>plasmid</b> |
| Size (bp)              | 1,635,045                                                                                                          | 37,174         |
| % CG content           | 30.57                                                                                                              | 25.91          |
| CDS numbers            | 1613                                                                                                               | 53             |
| Assigned function      | 1378 (85.5%)                                                                                                       | 15             |
| hypothetical/conserved | 233 (14.5%)                                                                                                        | 38             |
| % Coding               | 92.9                                                                                                               | 86.8           |
| Avg. length (bp)       | 942                                                                                                                | 576            |
| Pseudogenes            | 20                                                                                                                 | 0              |
| tRNA                   | 44                                                                                                                 | -              |
| rRNA operons           | 3                                                                                                                  | -              |
| miscellaneous RNA      | 4                                                                                                                  | -              |
| Transposase fragments  | 4                                                                                                                  | -              |
| CRISPR                 | 4                                                                                                                  | -              |
| PolyG:C tracts         | 27                                                                                                                 | 1              |

CDS no. excludes pseudogenes.

Assigned function includes those assigned to a specific function and those assigned to a general function, and putative functions.

Average length and %Coding values are based on CDS only, exclude pseudogenes and RNA genes.

PolyG:C tracts: those of ≥7 consecutive G or C residue

**Table S3. List of different genes between IA3902 and NCTC11168**

| VRs <sup>a</sup> | Locus tag   | Size (aa) | IA3902 | NCTC 11168 | Annotation                                                 | Remarks (comparisons to NCTC11168/81-176/81116/RM1221 mainly)                                                                                                                                                                                                                                                                                    |
|------------------|-------------|-----------|--------|------------|------------------------------------------------------------|--------------------------------------------------------------------------------------------------------------------------------------------------------------------------------------------------------------------------------------------------------------------------------------------------------------------------------------------------|
| VR1              | CJSA_0032   | 1257      | +      | +          | Type II rest.mod.enzyme                                    | Cj0031, 1243aa; 82% identity between the homologs                                                                                                                                                                                                                                                                                                |
|                  | CJSA_0033   | 708       | +      | -          | putative cytoplasmic protein                               | Replaced by Cj0033, 593aa (integral membrane protein); not present in any <i>Campylobacter</i> ; 49% identity to HPKB_1419, 716aa, putative cytoplasmic protein; has ABC transporter nucleotide binding domain (not a significant match); 34% identity to MimD; 22% GCcontent                                                                    |
| VR2              | CJSA_130    | 662       | +      | +          | McrBC restriction endonuclease                             | Cj0139, 783aa; 65% identity between the homologs                                                                                                                                                                                                                                                                                                 |
|                  | CJSA_135    | 651       | +      | +          | Methyl accepting chemotaxis protein                        | Cj0144, 659aa; 72% identity between the homologs                                                                                                                                                                                                                                                                                                 |
| VR3              | CJSA_0192   | 61        | +      | -          | hypothetical protein                                       | CJJ81176_pTet0049 homolog                                                                                                                                                                                                                                                                                                                        |
|                  | CJSA_0193   | 639       | +      | -          | tetracycline resistance protein TetO                       | CJJ81176_pTet0048 homolog                                                                                                                                                                                                                                                                                                                        |
|                  | TnpV        | 124       | +      | -          | transposase V; pseudo                                      | MGAS2096_Spy1150 homolog ( <i>Streptococcus pyogenes</i> )                                                                                                                                                                                                                                                                                       |
|                  | Cj0201c     | 201       | -      | +          | putative integral membrane protein                         | Totally missing in IA3902; present in other strains                                                                                                                                                                                                                                                                                              |
|                  | Cj0202c     | 113       | -      | +          | hypothetical protein                                       | Totally missing in IA3902; present in other strains                                                                                                                                                                                                                                                                                              |
| VR4              | CJSA_0239   | 706       | +      | +          | Methyl accepting chemotaxis protein                        | Cj0262c, 665aa; 68% identity between the homologs                                                                                                                                                                                                                                                                                                |
| VR5              | CJSA_585    | 223       | +      | +          | hypothetical protein                                       | Cj0617, 203aa; 57% identity between the homologs                                                                                                                                                                                                                                                                                                 |
|                  | CJSA_586    | 187       | +      | +          | hypothetical protein                                       | Cj0618, 215aa; 57% identity between the homologs                                                                                                                                                                                                                                                                                                 |
| VR6              | CJSA_0596   | 349       | +      | -          | prophage Lp2 protein 6 (uncharacterized conserved protein) | Replaced by Cj0628 (CapA; autotransporter, 144aa), putative lipoprotein (high similarity to CJSA_1588 and Cj1677-CapB; both 1121aa, which does not seem transcribed or translated in many <i>C. jejuni</i> ); has homolog in 81116 and 81-176. Replaced by R/M in RM1221. Neither <i>capA</i> nor <i>capB</i> is present in the other 3 strains. |
| VR7              | CJSA_0621   | 517       | +      | -          | MFS di-/tripeptide transporter                             | Has homologs in other <i>C. jejuni</i> strains; missing in 11168                                                                                                                                                                                                                                                                                 |
|                  | CJSA_0622/3 | 476       | +      | +          | MFS di-/tripeptide transporter, pseudogene                 | Replaced by Cj0654c, pseudogene in 11168                                                                                                                                                                                                                                                                                                         |
| VR8              | CJSA_0814   | 142       | +      | -          | FspA2 (involved in in-vitro cell binding and apoptosis)    | Replaced by Cj0859c, 142aa, FspA1 (both are <i>Campylobacter jejuni</i> -specific virulence factor that is secreted through the flagella filament). Identical to that of strain 84-25 and few other strains (ATCC43430-from calf feces-).                                                                                                        |
|                  | Cj0860      | 290       | -      | +          | putative integral membrane protein                         | Totally missing in IA3902; present in some other <i>C. jejuni</i> strains (mainly fspA1), but missing in many <i>C. jejuni</i> strains.                                                                                                                                                                                                          |
|                  | CJSA_1098   | 633       | +      | -          | TAT pathway signal protein                                 | Has identical in CJ84-25 (same neighbors too); homologs only in few other                                                                                                                                                                                                                                                                        |

|      |           |      |   |   |                                             |                                                                                                                         |
|------|-----------|------|---|---|---------------------------------------------|-------------------------------------------------------------------------------------------------------------------------|
| VR9  |           |      |   |   |                                             | jejuni and <i>C. lari</i> , and many other bacteria. Has significant Pfam match to NAD(P)-binding Rossmann-like domain. |
|      | Cj1158c   | 75   | - | + | small hydrophobic protein                   | These 3 ORFs replaced by CJSA_1098 in IA3902                                                                            |
|      | Cj1159c   | 40   | - | + | small hydrophobic protein                   |                                                                                                                         |
|      | Cj1160c   | 59   | - | + | hypothetical protein                        |                                                                                                                         |
| VR10 | CJSA_1243 | 404  | + | + | hypothetical protein                        | Cj1305c, 405aa; 82% identity between the homologs                                                                       |
|      | CJSA_1244 | 402  | + | + | hypothetical protein                        | Cj1306c, 408aa; 76% identity between the homologs                                                                       |
|      | CJSA_1256 | 650  | + | + | Motility accessory factor 1                 | Cj1318, 645aa; 81% identity between the homologs                                                                        |
|      | CJSA_1259 | 243  | + | - | methyltransferase domain-containing protein | Replaced by Cj1321; part of O-linked glycosylation locus; has close homology in <i>C. doylei</i> only                   |
|      | CJSA_1260 | 235  | + | - | methyltransferase domain-containing protein | Replaced by Cj1322; part of O-linked glycosylation locus; has homologs in <i>C. upsaliensis</i> and <i>doylei</i> .     |
|      | CJSA_1261 | 705  | + | - | hypothetical protein                        | Replaced by Cj1323/24; part of O-linked glycosylation locus; represented by multiple ORFs in other strains              |
|      | CJSA_1269 | 650  | + | + | PseD                                        | Cj1333; 84% identity between the homologs; O-linked locus                                                               |
|      | CJSA_1271 | 650  | + | + | Maf4                                        | Cj1335; 81% identity between the homologs; O-linked locus                                                               |
| VR11 | CJSA_1352 | 612  | + | + | Putative sugar transferase                  | Cj1421c (612aa), Cj1422c (625aa); 56% and 50% identity between the homologs; CPS locus                                  |
|      | CJSA_1353 | 240  | + | - | CPS biosynthesis protein                    | Has homolog only in <i>C. doylei</i> 269.97 (JJD26997_1800); isolated from human blood; HS:17; CPS locus                |
|      | CJSA_1354 | 507  | + | - | CPS biosynthesis protein                    | Has homolog only in <i>C. doylei</i> ; CPS locus                                                                        |
|      | CJSA_1355 | 132  | + | - | capsule biosynthesis phosphatase            | Has homolog only in <i>C. doylei</i> ; CPS locus                                                                        |
|      | CJSA_1356 | 639  | + | - | putative CPS biosynthesis protein           | No homologs; CPS locus                                                                                                  |
|      | CJSA_1357 | 619  | + | - | putative sugar nucleotidyltransferase       | No homologs; CPS locus                                                                                                  |
|      | CJSA_1358 | 101  | + | - | hypothetical protein                        | Has homolog only in <i>C. doylei</i> ; CPS locus                                                                        |
|      | CJSA_1359 | 111  | + | - | hypothetical protein                        | Has homolog only in <i>C. doylei</i> ; CPS locus                                                                        |
|      | CJSA_1360 | 241  | + | - | putative nucleotidyl transferase            | Has homolog only in <i>C. doylei</i> ; CPS locus                                                                        |
|      | CJSA_1361 | 212  | + | - | HAD superfamily hydrolase                   | Has homolog only in <i>C. doylei</i> ; CPS locus                                                                        |
|      | CJSA_1362 | 212  | + | - | hypothetical protein                        | Has homolog only in <i>C. doylei</i> ; CPS locus                                                                        |
|      | CJSA_1363 | 637  | + | + | putative sugar transferase                  | Cj1421c (612aa); Cj1422 (625aa) 48% identity between homologs; CPS locus                                                |
|      | CJSA_1364 | 851  | + | - | putative sugar transferase                  | Very similar to <i>C. jejuni</i> G1 (HS1.08; GBS isolate); CPS locus                                                    |
|      | CJSA_1365 | 1095 | + | - | TagF                                        | Identical to <i>C. jejuni</i> G1; CPS locus                                                                             |
|      | CJSA_1366 | 402  | + | - | Conserved hypothetical protein              | Identical to <i>C. jejuni</i> G1; CPS locus                                                                             |

|      |           |      |   |   |                                                 |                                                                                                    |
|------|-----------|------|---|---|-------------------------------------------------|----------------------------------------------------------------------------------------------------|
|      | CJSA_1367 | 315  | + | - | TagD                                            | Identical to <i>C. jejuni</i> G1; CPS locus                                                        |
|      | Cj1423c   | 221  | - | + | hddC                                            | Present in some <i>C. jejuni</i> ; CPS locus                                                       |
|      | Cj1424c   | 201  | - | + | gmhA2                                           | Present in some <i>C. jejuni</i>                                                                   |
|      | Cj1425c   | 339  | - | + | hddA                                            | Present in some <i>C. jejuni</i>                                                                   |
|      | Cj1426c   | 283  | - | + | putative methyltransferase family protein       | Present in some <i>C. jejuni</i>                                                                   |
|      | Cj1427c   | 313  | - | + | putative sugar-nucleotide epimerase/dehydratase | Present in some <i>C. jejuni</i>                                                                   |
|      | Cj1428c   | 346  | - | + | GDP-L-fucose synthetase                         | Present in some <i>C. jejuni</i>                                                                   |
|      | Cj1429c   | 308  | - | + | hypothetical protein                            | Present in some <i>C. jejuni</i>                                                                   |
|      | Cj1430c   | 181  | - | + | rfbC                                            | Present in some <i>C. jejuni</i>                                                                   |
|      | Cj1431c   | 582  | - | + | hddD                                            | Present in some <i>C. jejuni</i>                                                                   |
|      | Cj1432c   | 1031 | - | + | putative sugar transferase                      | Present in some <i>C. jejuni</i>                                                                   |
|      | Cj1433c   | 368  | - | + | hypothetical protein                            | Present in some <i>C. jejuni</i>                                                                   |
|      | Cj1434c   | 445  | - | + | putative sugar transferase                      | Present in some <i>C. jejuni</i>                                                                   |
|      | Cj1435c   | 211  | - | + | putative phosphatase                            | Present in some <i>C. jejuni</i>                                                                   |
|      | Cj1436c   | 390  | - | + | aminotransferase                                | Present in some <i>C. jejuni</i>                                                                   |
|      | Cj1437c   | 367  | - | + | aminotransferase                                | Present in some <i>C. jejuni</i>                                                                   |
|      | Cj1438c   | 776  | - | + | putative sugar transferase                      | Present in some <i>C. jejuni</i>                                                                   |
|      | Cj1439c   | 368  | - | + | glf                                             | Present in some <i>C. jejuni</i>                                                                   |
|      | Cj1440c   | 407  | - | + | putative sugar transferase                      | Present in some <i>C. jejuni</i>                                                                   |
|      | Cj1441c   | 393  | - | + | kfiD                                            | Present in some <i>C. jejuni</i>                                                                   |
| VR12 | Cj1442c   | 544  | - | + | putative sugar transferase                      | Present in some <i>C. jejuni</i> ; CPS locus                                                       |
|      | Cj1722c   | 33   | - | + | hypothetical protein                            | Not present in any other <i>C. jejuni</i> strains                                                  |
|      | Cj1723c   | 74   | - | + | putative periplasmic protein                    |                                                                                                    |
|      | Cj1725    | 199  | - | + | putative periplasmic protein                    |                                                                                                    |
|      | Cj1726c   | 293  | - | + | homoserine O-succinyltransferase                | Not present in <i>C. jejuni</i> 81116, either (seems like they are present in most other strains). |
|      | Cj1727c   | 423  | - | + | putative O-acetylhomoserine-lyase               |                                                                                                    |
|      | Cj1728c   | 51   | - | + | small hydrophobic protein                       | Present in 81-176, too.                                                                            |
|      | CJSA_1632 | 852  | + | + | FlgE2                                           | Cj1729c, 865aa, 80% identity between the homologs                                                  |

| Pseudogenes <sup>b</sup> |           |      |   |   |                                                                |                                                                                                                                                                            |
|--------------------------|-----------|------|---|---|----------------------------------------------------------------|----------------------------------------------------------------------------------------------------------------------------------------------------------------------------|
| Functional in IA3902     | CJSA_0491 | 589  | + | - | Na/Pi-cotransporter, putative                                  | Cj0522/3/4 pseudogene in NCTC11168                                                                                                                                         |
|                          | CJSA_0639 | 96   | + | - | putative potassium-transporting ATPase subunit B N-terminus    | Cj0678 pseudogene in NCTC11168                                                                                                                                             |
|                          | CJSA_0771 | 174  | + | - | hypothetical protein                                           | Cj0815/6 pseudogene in NCTC11168                                                                                                                                           |
|                          | CJSA_1007 | 206  | + | - | nitroreductase family protein                                  | Pseudogene in 11168 (Cj1064) and RM1221; present in 81-176 and CJ84-25; divided in two ORFs in 81116. A similar intact gene present immediately downstream in all strains! |
|                          | CJSA_1393 | 393  | + | - | general secretory pathway protein F                            | Pseudogene in 11168 (Cj1470c); intact in other <i>C. jejuni</i> strains                                                                                                    |
|                          | CJSA_1474 | 107  | + | - | arsenical resistance operon repressor (ArsR)                   | Replaced by Cj1561/62, pseudogene in NCTC11168, 59/50aa, putative transcriptional regulator; homologs present in RM1221/81116                                              |
|                          | CJSA1588  | 1121 | + | - | putative lipoprotein                                           | Cj1677, pseudogene in NCTC11168                                                                                                                                            |
| Functional in NCTC11168  | Cj0030    | 465  | - | + | hypothetical protein                                           | CJSA_0030/31 pseudogene in IA3902                                                                                                                                          |
|                          | Cj0170    | 247  | - | + | hypothetical protein                                           | CJSA_0160/161, pseudogene in IA3902                                                                                                                                        |
|                          | Cj0203    | 448  | - | + | putative citrate transporter                                   | Interrupted by insertion of a 5425bp region in IA3902; pseudo in IA3902 (CJSA_0191).                                                                                       |
|                          | Cj0484    | 410  | - | + | putative MFS (Major Facilitator Superfamily) transport protein | CJSA_0454/5, pseudogene in IA3902                                                                                                                                          |
|                          | Cj0566    | 488  | - | + | hypothetical protein                                           | CJSA_0533, pseudogene in IA3902                                                                                                                                            |
|                          | Cj0570    | 355  | - | + | putative ATP/GTP binding protein                               | CJSA_0537/8, pseudogene in IA3902                                                                                                                                          |
|                          | Cj0672    | 62   | - | + | putative periplasmic protein                                   | Replaced by CJSA_0636, pseudogene in IA390262aa                                                                                                                            |
|                          | Cj0677    | 681  | - | + | potassium-transporting ATPase subunit B                        | CJSA_0638, pseudogene in IA3902                                                                                                                                            |
|                          | Cj0679    | 606  | - | + | truncated KdpD protein                                         | CJSA_0640, pseudogene in IA3902                                                                                                                                            |
|                          | Cj1110c   | 429  | - | + | MCP-type signal transduction protein                           | Pseudogene in IA3902 only (CJSA_1052); One study show it did not affect chick colonization; one study found it is membrane associated; much lower expression level in 3902 |
|                          | Cj1631c   | 289  | - | + | conserved hypothetical protein                                 | Pseudogene in IA3902 (CJSA_1543); intact in other <i>C. jejuni</i> strains                                                                                                 |
|                          | Cj1721c   | 214  | - | + | putative outer membrane protein                                | Pseudogene in IA3902 (CJSA_1630); intact in other <i>C. jejuni</i>                                                                                                         |

**pVir (compared to pVir of strain 81-176)<sup>c</sup>**

|  |                  |     |   |    |                                |                                                    |
|--|------------------|-----|---|----|--------------------------------|----------------------------------------------------|
|  | CJSA_pVir0017    | 148 | + | NA | conserved hypothetical protein | Replaced by CJ81176_pVir0017, hypothetical protein |
|  | CJSA_pVir0018    | 145 | + | NA | hypothetical protein           | Replaced by CJ81176_pVir0018, hypothetical protein |
|  | CJ81176_pVir0043 | 42  | - | NA | hypothetical protein           | None                                               |
|  | CJSA_pVir0045    | 94  | + | NA | hypothetical protein           | Replaced by CJ81176_pVir0047, hypothetical protein |
|  | CJSA_pVir0046    | 91  | + | NA | addiction module toxin         | Replaced by CJ81176_pVir0047, hypothetical protein |

- a. The plus (+) and minus (-) indicate the presence and absence of genes, respectively.
- b. Plus (+) indicates genes predicted to be functional and Minus (-) indicates genes predicted to be pseudogenes in IA3902 or NCTC11168
- c. The plus (+) and minus (-) indicate the presence and absence of genes in IA3902, respectively; NA indicate the gene is not available for NCTC11168

**Table S4A.** Up-regulated Genes in IA3902 by microarray

| Name    | Gene        | Annotation                                                        | Fold Change(UP) |
|---------|-------------|-------------------------------------------------------------------|-----------------|
| Cj0012c | <i>rrc</i>  | non-haem iron protein                                             | 10.34           |
| Cj0043  | <i>flgE</i> | flagellar hook protein                                            | 3.66            |
| Cj0055c |             | conserved hypothetical protein Cj0055c                            | 3.54            |
| Cj0056c |             | hypothetical protein                                              | 7.46            |
| Cj0122  |             | hypothetical protein                                              | 17.86           |
| Cj0155c | <i>rpmE</i> | 50S ribosomal protein L31                                         | 2.64            |
| Cj0224  | <i>argC</i> | N-acetyl-gamma-glutamyl-phosphate reductase                       | 4.03            |
| Cj0225  |             | putative acetyltransferase                                        | 4.81            |
| Cj0226  | <i>argB</i> | acetylglutamate kinase                                            | 5.33            |
| Cj0227  | <i>argD</i> | putative acetylornithine/succinyldiaminopimelate aminotransferase | 4.75            |
| Cj0239c | <i>iscU</i> | NifU protein homolog                                              | 5.23            |
| Cj0240c | <i>iscS</i> | cysteine desulfurase (NifS protein homolog)                       | 2.41            |
| Cj0241c |             | putative iron-binding protein                                     | 2.76            |
| Cj0301c | <i>modB</i> | putative molybdenum transport system permease protein             | 4.04            |
| Cj0302c |             | putative molybdenum-pterin binding protein                        | 5.51            |
| Cj0303c | <i>modA</i> | putative molybdate-binding lipoprotein                            | 5.67            |
| Cj0324  | <i>ubiE</i> | ubiquinone/menaquinone biosynthesis methyltransferase             | 3.25            |
| Cj0333c | <i>fdxA</i> | ferredoxin                                                        | 10.54           |
| Cj0343c |             | putative integral membrane protein                                | 2.35            |
| Cj0354c | <i>fdxB</i> | ferredoxin                                                        | 2.67            |
| Cj0391c |             | hypothetical protein                                              | 8.27            |
| Cj0410  | <i>frdB</i> | fumarate reductase iron-sulfur subunit                            | 3.45            |
| Cj0414  |             | putative oxidoreductase subunit                                   | 3.56            |
| Cj0415  |             | putative GMC oxidoreductase subunit                               | 4.12            |
| Cj0416  |             | hypothetical protein                                              | 11.27           |
| Cj0417  |             | hypothetical protein                                              | 11.69           |
| Cj0428  |             | hypothetical protein                                              | 2.71            |
| Cj0524  |             | hypothetical protein                                              | 10.77           |
| Cj0536  | <i>oorA</i> | 2-oxoglutarate-acceptor oxidoreductase subunit OorA               | 2.14            |
| Cj0545  | <i>hemC</i> | porphobilinogen deaminase                                         | 2.59            |
| Cj0547  | <i>flaG</i> | flagellar protein FlaG                                            | 6.33            |
| Cj0548  | <i>fliD</i> | flagellar capping protein                                         | 4.78            |
| Cj0549  | <i>fliS</i> | flagellar protein FliS                                            | 4.64            |
| Cj0550  |             | hypothetical protein                                              | 3.68            |
| Cj0589  | <i>ribF</i> | bifunctional riboflavin kinase/FMN adenylyltransferase            | 2.59            |
| Cj0590  |             | putative SAM-dependent methyltransferase                          | 6.11            |
| Cj0613  | <i>pstS</i> | putative periplasmic phosphate binding protein                    | 2.81            |
| Cj0614  | <i>pstC</i> | putative phosphate transport system permease protein              | 7.50            |
| Cj0622  | <i>hypF</i> | carbamoyltransferase                                              | 5.08            |
| Cj0671  | <i>dcuB</i> | anaerobic C4-dicarboxylate transporter                            | 15.08           |
| Cj0676  | <i>kdpA</i> | pseudo                                                            | 3.38            |

|         |              |                                                                    |       |
|---------|--------------|--------------------------------------------------------------------|-------|
| Cj0687c | <i>flgH</i>  | flagellar basal body L-ring protein                                | 5.02  |
| Cj0697  | <i>flgG2</i> | flagellar basal-body rod protein                                   | 3.25  |
| Cj0698  | <i>flgG</i>  | flagellar basal body rod protein FlgG                              | 2.73  |
| Cj0769c | <i>flgA</i>  | flagellar basal body P-ring biosynthesis protein FlgA              | 3.28  |
| Cj0770c |              | putative NLPA family lipoprotein                                   | 10.56 |
| Cj0823  |              | hypothetical protein                                               | 2.36  |
| Cj0851c |              | putative integral membrane protein                                 | 6.88  |
| Cj0864  |              | putative periplasmic protein                                       | 4.37  |
| Cj0866  |              | pseudo                                                             | 3.15  |
| Cj0873c |              | hypothetical protein                                               | 3.73  |
| Cj0874c |              | putative cytochrome C                                              | 2.92  |
| Cj0949c |              | putative peptidyl-arginine deiminase family protein                | 2.32  |
| Cj0965c |              | putative acyl-CoA thioester hydrolase                              | 2.31  |
| Cj0977  |              | hypothetical protein                                               | 8.85  |
| Cj1001  | <i>rpoD</i>  | RNA polymerase sigma factor RpoD                                   | 2.06  |
| Cj1012c |              | hypothetical protein                                               | 11.52 |
| Cj1025c |              | hypothetical protein                                               | 6.56  |
| Cj1026c |              | putative lipoprotein                                               | 2.87  |
| Cj1042c |              | putative transcriptional regulatory protein                        | 3.88  |
| Cj1108  | <i>clpA</i>  | ATP-dependent Clp protease ATP-binding subunit                     | 2.05  |
| Cj1123c | <i>pglD</i>  | acetyltransferase                                                  | 2.93  |
| Cj1169c |              | putative periplasmic protein                                       | 6.02  |
| Cj1190c | <i>cetA</i>  | bipartate energy taxis response protein cetA                       | 2.43  |
| Cj1224  |              | putative iron-binding protein                                      | 3.92  |
| Cj1225  |              | conserved hypothetical protein Cj1225                              | 4.44  |
| Cj1253  | <i>pnp</i>   | polynucleotide phosphorylase/polyadenylase                         | 2.73  |
| Cj1262  | <i>racS</i>  | two-component sensor (histidine kinase)                            | 2.13  |
| Cj1265c | <i>hydC</i>  | Ni/Fe-hydrogenase B-type cytochrome subunit                        | 3.49  |
| Cj1266c | <i>hydB</i>  | Ni/Fe-hydrogenase large subunit                                    | 4.03  |
| Cj1267c | <i>hydA</i>  | Ni/Fe-hydrogenase small chain                                      | 2.96  |
| Cj1288c | <i>gltX</i>  | glutamyl-tRNA synthetase                                           | 2.34  |
| Cj1290c | <i>accC</i>  | biotin carboxylase                                                 | 2.61  |
| Cj1291c | <i>accB</i>  | putative biotin carboxyl carrier protein of acetyl-CoA carboxylase | 2.28  |
| Cj1293  | <i>pseB</i>  | UDP-GlcNAc-specific C4,6 dehydratase/C5 epimerase                  | 2.19  |
| Cj1316c | <i>pseA</i>  | pseudaminic acid biosynthesis PseA protein                         | 5.20  |
| Cj1334  | <i>maf3</i>  | motility accessory factor (function unknown)                       | 4.70  |
| Cj1358c | <i>nrfH</i>  | putative periplasmic cytochrome C                                  | 3.17  |
| Cj1362  | <i>ruvB</i>  | Holliday junction DNA helicase RuvB                                | 3.92  |
| Cj1464  | <i>flgM</i>  | hypothetical protein                                               | 8.63  |
| Cj1465  |              | hypothetical protein                                               | 4.63  |
| Cj1466  | <i>flgK</i>  | flagellar hook-associated protein FlgK                             | 3.29  |
| Cj1500  |              | putative inner membrane protein                                    | 2.66  |
| Cj1501  |              | hypothetical protein                                               | 2.71  |
| Cj1507c |              | putative regulatory protein                                        | 2.29  |
| Cj1509c | <i>fdhC</i>  | putative formate dehydrogenase, cytochrom B subunit                | 2.50  |
| Cj1510c | <i>fdhB</i>  | putative formate dehydrogenase iron-sulfur subunit                 | 3.05  |

|         |             |                                                                          |       |
|---------|-------------|--------------------------------------------------------------------------|-------|
| Cj1511c | <i>fdhA</i> | putative formate dehydrogenase large subunit (Selenocysteine containing) | 3.83  |
| Cj1513c |             | possible periplasmic protein                                             | 2.46  |
| Cj1514c |             | hypothetical protein                                                     | 2.30  |
| Cj1522c |             | putative CRISPR-associated protein                                       | 2.51  |
| Cj1530  | <i>coaE</i> | dephospho-CoA kinase                                                     | 6.69  |
| Cj1531  | <i>dapF</i> | diaminopimelate epimerase                                                | 2.47  |
| Cj1540  |             | putative periplasmic protein                                             | 2.80  |
| Cj1566c | <i>nuoN</i> | NADH dehydrogenase I chain N                                             | 3.03  |
| Cj1570c | <i>nuoJ</i> | NADH dehydrogenase subunit J                                             | 2.29  |
| Cj1572c | <i>nuoH</i> | NADH dehydrogenase subunit H                                             | 2.64  |
| Cj1577c | <i>nuoC</i> | NADH dehydrogenase subunit C                                             | 2.30  |
| Cj1578c | <i>nuoB</i> | NADH dehydrogenase subunit B                                             | 2.25  |
| Cj1586  | <i>cgb</i>  | single domain haemoglobin                                                | 2.81  |
| Cj1622  | <i>ribD</i> | riboflavin-specific deaminase/reductase                                  | 2.44  |
| Cj1624c | <i>sdaA</i> | L-serine dehydratase                                                     | 9.27  |
| Cj1625c | <i>sdaC</i> | amino acid transporter                                                   | 10.31 |
| Cj1632c |             | putative periplasmic protein                                             | 9.32  |
| Cj1656c |             | hypothetical protein                                                     | 7.83  |
| Cj1685c | <i>bioB</i> | biotin synthase                                                          | 3.51  |
| Cj1686c | <i>topA</i> | DNA topoisomerase I                                                      | 5.51  |
| Cj1731c | <i>ruvC</i> | Holliday junction resolvase                                              | 2.48  |

**Table S4B.** Down-regulated genes in IA3902 by microarray

| Name    | Gene         | Annotation                                                                 | Fold Change(Down) |
|---------|--------------|----------------------------------------------------------------------------|-------------------|
| Cj0021c |              | putative fumarylacetoacetate (FAA) hydrolase family protein                | 12.24             |
| Cj0074c |              | putative iron-sulfur protein                                               | 2.08              |
| Cj0075c |              | putative oxidoreductase iron-sulfur subunit                                | 2.02              |
| Cj0076c | <i>lctP</i>  | L-lactate permease                                                         | 3.11              |
| Cj0079c | <i>cdtA</i>  | cytolethal distending toxin A                                              | 2.59              |
| Cj0086c | <i>ung</i>   | uracil-DNA glycosylase                                                     | 5.76              |
| Cj0105  | <i>atpA</i>  | F0F1 ATP synthase subunit alpha                                            | 2.05              |
| Cj0109  | <i>exbB3</i> | putative MotA/TolQ/ExbB proton channel family protein                      | 2.61              |
| Cj0141c |              | putative ABC transporter integral membrane protein                         | 2.49              |
| Cj0143c |              | putative periplasmic solute binding protein for ABC transport system       | 3.46              |
| Cj0146c | <i>trxB</i>  | thioredoxin reductase                                                      | 4.68              |
| Cj0168c |              | putative periplasmic protein                                               | 2.68              |
| Cj0174c | <i>cfbpB</i> | putative iron-uptake ABC transport system permease protein                 | 8.61              |
| Cj0175c | <i>cfbpA</i> | putative iron-uptake ABC transport system,periplasmic iron-binding protein | 7.03              |
| Cj0176c |              | putative lipoprotein                                                       | 7.25              |
| Cj0182  |              | putative transporter                                                       | 2.74              |
| Cj0203  |              | putative citrate transporter                                               | 334.83            |
| Cj0372  |              | putative glutathionylspermidine synthase                                   | 2.15              |
| Cj0375  |              | putative lipoprotein                                                       | 2.68              |

|         |              |                                                                   |        |
|---------|--------------|-------------------------------------------------------------------|--------|
| Cj0376  |              | putative periplasmic protein                                      | 3.98   |
| Cj0393c | <i>mgo</i>   | putative malate:quinone oxidoreductase                            | 3.39   |
| Cj0481  | <i>dapA</i>  | putative dihydrodipicolinate synthase                             | 16.90  |
| Cj0482  | <i>uxaA'</i> | putative altronate hydrolase N-terminus                           | 7.34   |
| Cj0483  | <i>uxaA'</i> | putative altronate hydrolase C-terminus                           | 21.15  |
| Cj0484  |              | putative MFS (Major Facilitator Superfamily) transport protein    | 8.25   |
| Cj0485  |              | short chain dehydrogenase                                         | 163.96 |
| Cj0486  |              | putative sugar transporter                                        | 13.13  |
| Cj0488  |              | conserved hypothetical protein Cj0488                             | 7.47   |
| Cj0489  | <i>ald'</i>  | putative aldehyde dehydrogenase N-terminus                        | 6.88   |
| Cj0552  |              | hypothetical protein                                              | 2.10   |
| Cj0591c |              | putative lipoprotein                                              | 3.15   |
| Cj0592c |              | putative periplasmic protein                                      | 2.76   |
| Cj0628  |              | putative lipoprotein                                              | 4.29   |
| Cj0755  | <i>cfrA</i>  | ferric enterobactin uptake receptor                               | 77.88  |
| Cj0762c | <i>aspB</i>  | aspartate aminotransferase                                        | 20.91  |
| Cj0774c |              | ABC transport system ATP-binding protein                          | 2.15   |
| Cj0778  | <i>peb2</i>  | major antigenic peptide PEB2                                      | 2.20   |
| Cj0790  | <i>purU</i>  | formyltetrahydrofolate deformylase                                | 2.34   |
| Cj0818  |              | putative lipoprotein                                              | 6.25   |
| Cj0833c |              | putative oxidoreductase                                           | 3.49   |
| Cj0834c |              | ankyrin repeat-containing putative periplasmic protein            | 4.77   |
| Cj0835c | <i>acnB</i>  | bifunctional aconitate hydratase 2/2-methylisocitrate dehydratase | 5.44   |
| Cj0900c |              | small hydrophobic protein                                         | 2.11   |
| Cj0903c |              | putative amino-acid transport protein                             | 2.82   |
| Cj0909  |              | putative periplasmic protein                                      | 2.79   |
| Cj0910  |              | putative periplasmic protein                                      | 2.29   |
| Cj0916c |              | conserved hypothetical protein Cj0916c                            | 2.97   |
| Cj0919c |              | putative ABC-type amino-acid transporter permease protein         | 4.88   |
| Cj0920c |              | putative ABC-type amino-acid transporter permease protein         | 8.33   |
| Cj0921c | <i>peb1A</i> | bifunctional adhesin/ABC transporter                              | 7.12   |
| Cj0922c | <i>pebC</i>  | aspartate/glutamate-binding protein                               | 6.33   |
| Cj1007c |              | ABC-type amino-acid transporter ATP-binding protein               | 6.33   |
| Cj1008c | <i>aroB</i>  | putative mechanosensitive ion channel family protein              | 2.24   |
| Cj1102  | <i>truB</i>  | 3-dehydroquinate synthase                                         | 2.60   |
| Cj1110c |              | tRNA pseudouridine synthase B                                     | 3.12   |
| Cj1137c |              | putative MCP-type signal transduction protein                     | 25.42  |
| Cj1203c |              | putative glycosyltransferase                                      | 4.45   |
| Cj1275c |              | putative integral membrane protein                                | 4.47   |
| Cj1308  |              | putative peptidase M23 family protein                             | 2.99   |
| Cj1354  | <i>ceuD</i>  | putative acyl carrier protein                                     | 2.13   |
| Cj1364c | <i>fumC</i>  | enterochelin uptake ATP-binding protein                           | 11.92  |
| Cj1373  |              | fumarate hydratase                                                | 2.27   |
| Cj1383c |              | putative integral membrane protein                                | 6.29   |
| Cj1384c |              | hypothetical protein                                              | 132.52 |
|         |              | hypothetical protein                                              | 143.09 |

|         |              |                                                                                    |        |
|---------|--------------|------------------------------------------------------------------------------------|--------|
| Cj1502c | <i>putP</i>  | putative sodium/proline symporter                                                  | 5.52   |
| Cj1503c | <i>putA</i>  | putative proline<br>dehydrogenase/delta-1-pyrroline-5-carboxylate<br>dehydrogenase | 6.17   |
| Cj1537c | <i>acs</i>   | acetyl-CoA synthetase                                                              | 5.78   |
| Cj1541  |              | LamB/YcsF family protein                                                           | 2.85   |
| Cj1548c |              | putative NADP-dependent alcohol dehydrogenase                                      | 2.51   |
| Cj1613c | <i>chuZ</i>  | putative pyridoxamine 5'-phosphate oxidase                                         | 9.71   |
| Cj1614  | <i>chuA</i>  | haemin uptake system outer membrane receptor                                       | 127.69 |
| Cj1615  | <i>chuB</i>  | putative haemin uptake system permease protein                                     | 33.45  |
| Cj1617  | <i>chuD</i>  | putative haemin uptake system periplasmic<br>haemin-binding protein                | 47.21  |
| Cj1628  | <i>exbB2</i> | putative exbB/tolQ family transport protein                                        | 56.49  |
| Cj1629  | <i>exbD2</i> | putative exbD/tolR family transport protein                                        | 29.81  |
| Cj1651c | <i>map</i>   | methionine aminopeptidase                                                          | 6.07   |
| Cj1659  | <i>p19</i>   | periplasmic protein p19                                                            | 3.60   |
| Cj1660  |              | putative integral membrane protein                                                 | 3.08   |
| Cj1661  |              | possible ABC transport system permease                                             | 3.54   |
| Cj1662  |              | putative integral membrane protein                                                 | 3.50   |
| Cj1663  |              | putative ABC transport system ATP-binding protein                                  | 3.22   |
| Cj1664  |              | putative periplasmic thiredoxin                                                    | 3.27   |

---

Table S5. Primer for qRT-PCR used in this study

| Gene    | FP                    | RP                    |
|---------|-----------------------|-----------------------|
| FurR    | GAGCTTGCCAATAAACCTCA  | CAATCAAGGCTTGCTGTCTT  |
| PerR    | AAAAGCTACTCCGCAAAGACT | CCGTCGCTAAAGAGATTGAA  |
| FeoB    | CCAAGTGAAAAAGCAGGAAA  | AAGGTTTCATCAAGTCCACGA |
| CfrA    | CCAGGCGTTGATTTATATGC  | CCCATCAATCAAAACCAAAG  |
| ChuA    | AGCAAAAATACCAGCAGTGG  | AAAGAAATTCAGGGCGATT   |
| p19     | CAATCCAAATGGTTTTCCAG  | ATTGCACCTGTGTCGGTATT  |
| cfbpA   | TAGCTTCGCCTGCAAATACT  | GGCTAAAGGTGTGCTTGAAA  |
| Sdac    | GCAAAATAGCCAAAACAGGA  | CAGCGATCATTACCTTTGCT  |
| DcuB    | GCATCCTTGGACTTATGCTG  | CACCAATTCCTAAAGCCAAA  |
| FrdB    | AGATCCGCATGACCATAGAA  | TCTTCACAAGCAAGCAATGA  |
| oorA    | GCGAGCTTAATATGGGACAA  | GATAGGACGACCATTTGCAC  |
| 16SrRNA | TACCTGGGCTTGATATCCTA  | GGACTTAACCCAACATCTCA  |

Table S6. Protein identification of spots of 2D-DIGE

| Spot ID | IA3902 / NCTC11168 | IA5908 / NCTC11168 | IA3902    | NCTC11168 | Gene         | Description                                                                    | Theoretical MW (Da) | Theoretical pI | Comments                                                                           |
|---------|--------------------|--------------------|-----------|-----------|--------------|--------------------------------------------------------------------------------|---------------------|----------------|------------------------------------------------------------------------------------|
| 1       | 3.18               | -1.56              | N/A       | N/A       |              |                                                                                |                     |                | Not identified due to inconsistency between abortion strains relative to NCTC11168 |
| 2       | -9.41              | -9.53              |           | cj1729c   | <i>flgE</i>  | flagellar hook subunit protein                                                 | 91918.97            | 4.86           | 78% identical to CJSA_1632, which is spot 3 in IA3902.                             |
| 3       | 3.75               | 3.34               | CJSA_1632 |           | <i>flgE</i>  | flagellar hook protein FlgE                                                    | 90824.07            | 5.19           | 78% identical to Cj1729c, which is spot 2 in 11168                                 |
| 4       | -11.39             | -8.14              | N/A       | N/A       |              |                                                                                |                     |                | no confidence in protein ID                                                        |
| 5       | 2.75               | 1.84               | N/A       | N/A       |              |                                                                                |                     |                | no confidence in protein ID                                                        |
| 6       | -2.83              | -2.6               | N/A???    | cj 0129c  |              | OMP85 outer membrane protein                                                   | 83197               | 5.5            | 99% identical to CJSA_0120, which is spot 7 in IA3902                              |
| 7       | 3.55               | 3.63               | CJSA_0120 |           |              | OMP85 family outer membrane protein                                            | 83127               | 5.6            | 99% identical to Cj0129c, which is spot 6 in 11168.                                |
| 8       | -9.25              | -6.65              | N/A       | N/A       |              |                                                                                |                     |                | no confidence in protein ID                                                        |
| 9       | -10.25             | -8                 | CJSA_0712 | cj 0755   | <i>cfrA</i>  | ferric enterobactin uptake receptor CfrA                                       | 77554.48            | 5.29           | 94% identity; CJSA_0712, pI/mw: 5.41 / 77785.97                                    |
| 10      | -1.59              | 2.2                | N/A       | N/A       |              |                                                                                |                     |                | Not identified due to inconsistency between abortion strains relative to NCTC11168 |
| 11      | 2.09               | 1.73               | N/A       | N/A       |              |                                                                                |                     |                | Not identified due to inconsistency between abortion strains relative to NCTC11168 |
| 12      | -1.89              | -1.95              |           | cj 0518   | <i>htpG</i>  | heat shock protein 90 HtpG                                                     | 69654.39            | 5.09           | 98% identical to CJSA_0488, which is spot 14 in IA3902                             |
| 13      | 2.08               | 1.99               | CJSA_0488 |           | <i>htpG</i>  | heat shock protein 90 HtpG                                                     | 69600.35            | 5.12           | 98% identical to Cj0518, which is spot 13 in 11168.                                |
| 14      | 3.25               | 3.3                | CJSA_0607 |           | <i>aspS</i>  | aspartyl-tRNA synthetase                                                       | 66150.87            | 5.71           | 99% identical to Cj0640c, which is spot 16 in 11168.                               |
| 15      | -5.02              | -6.78              |           | cj 0640c  | <i>aspS</i>  | aspartyl-tRNA synthetase                                                       | 66166.92            | 5.8            | 99% identical to Cj0640c, which is spot 15 in IA3902                               |
| 16      | -6.02              | -4.3               | CJSA_1526 | cj 1614   | <i>chuA</i>  | haemin uptake system outer membrane receptor ChuA                              | 80940.38            | 6.26           | 100% identity                                                                      |
| 17      | -3.21              | -4.79              | N/A       | N/A       |              |                                                                                |                     |                | no confidence in protein ID                                                        |
| 18      | -1.5               | -2.05              | N/A       | N/A       |              |                                                                                |                     |                | no confidence in protein ID                                                        |
| 19      | -5.17              | -8.86              |           | cj 1339c  | <i>flaA</i>  | flagellin FlaA                                                                 | 59038.66            | 5.59           | 93% identical to CJSA_1274, which is spot 21 in IA3902.                            |
| 20      | 2.89               | 1.77               | CJSA_1274 |           | <i>flaA</i>  | flagellin FlaA                                                                 | 59753.54            | 6.52           | 93% identical to Cj1339c, which is spot 20 in 11168.                               |
| 21      | 2.45               | 2.52               | CJSA_1274 |           | <i>flaA</i>  | flagellin FlaA                                                                 | 59753.54            | 6.52           | 93% identical to Cj1339c, which is spot 20 in 11168.                               |
| 22      | 3.03               | -1.52              | N/A       | N/A       |              |                                                                                |                     |                | Not identified due to inconsistency between abortion strains relative to NCTC11168 |
| 23      | 2.31               | 2.54               | N/A       | N/A       |              |                                                                                |                     |                | no confidence in protein ID                                                        |
| 24      | 2.92               | 2.68               | CJSA_0652 |           | <i>pta</i>   | phosphate acetyltransferase Pta                                                | 56178.69            | 5.54           | 99% identical to Cj0688, which is spot 30 in 11168.                                |
| 25      | 2.27               | 2.31               | CJSA_0652 |           | <i>pta</i>   | phosphate acetyltransferase Pta                                                | 56178.69            | 5.54           | 99% identical to Cj0688, which is spot 30 in 11168.                                |
| 26      | -2.47              | -2.28              |           | cj 0688   | <i>pta</i>   | putative phosphate acetyltransferase Pta                                       | 56177.75            | 5.75           | 99% identical to CJSA_0652, which is spot 28, 29 in IA3902.                        |
| 27      | -2.2               | -2.3               |           | cj 1058c  | <i>guaB</i>  | inosine-5'-monophosphate dehydrogenase GuaB                                    | 52151.21            | 7.15           | 99 % identical to CJSA_1001, which is spot 32 in IA3902                            |
| 28      | 3.42               | 3                  | CJSA_1001 |           | <i>guaB</i>  | inosine-5'-monophosphate dehydrogenase GuaB                                    | 52150.22            | 7.66           | 99 % identical to Cj1058, which is spot 31 in 11168.                               |
| 29      | -1.76              | -1.86              |           | cj 0662c  | <i>hslU</i>  | ATP-dependent Hsl protease ATP-binding subunit HslU                            | 49779.51            | 5.71           | 99% identical to CJSA_0627, which is spot spot 34 in IA3902.                       |
| 30      | 3.84               | 3.27               | CJSA_0627 |           | <i>hslU</i>  | ATP-dependent protease ATP-binding subunit HslU                                | 49778.52            | 5.84           | 99% identical to Cj0662c, which is spot 33 in 11168.                               |
| 31      | -3.98              | -4.51              |           | cj 1170c  | <i>omp50</i> | 50 kda outer membrane protein precursor Omp50                                  | 53339.85            | 6.14           | 88% identical to CJSA_1108, which is spot 36 in IA3902.                            |
| 32      | 3.96               | 4.04               | CJSA_1108 |           | <i>omp50</i> | 50 kda outer membrane protein precursor Omp50                                  | 53123.68            | 6.28           | 88% identical to Cj1170, which is spot 35 in 11168.                                |
| 33      | -2.59              | -1.9               |           | cj 1259   | <i>porA</i>  | Major outer membrane protein Momp                                              | 45687.52            | 4.71           | 95% identical to CJSA_1198, which is spot spots 39/40 in IA3902.                   |
| 34      | -43.42             | -11.09             |           | cj 1259   | <i>porA</i>  | Major outer membrane protein Momp                                              | 45687.52            | 4.71           | 95% identical to CJSA_1198, which is spot spots 39/40 in IA3902.                   |
| 35      | 4.93               | 8.6                | CJSA_1198 |           | <i>porA</i>  | Major outer membrane protein Momp                                              | 45706.61            | 4.87           | 95% identical to cj 1259, which is spot spots 37/38 in 11168.                      |
| 36      | 37.45              | 4.82               | CJSA_1198 |           | <i>porA</i>  | Major outer membrane protein Momp                                              | 45706.61            | 4.87           | 95% identical to cj 1259, which is spot spots 37/38 in 11168.                      |
| 37      | -34.99             | -42.62             | CJSA_0440 | cj 0470   | <i>tuf</i>   | translation elongation factor Tu                                               | 43593.62            | 5.11           | 100% identity                                                                      |
| 38      | 4.37               | 3.89               | CJSA_0596 |           |              | prophage Lp2 protein 6                                                         | 40822.58            | 5.09           | Absent in 11168                                                                    |
| 39      | -3.03              | -3.79              | CJSA_1119 | cj 1181c  | <i>tsf</i>   | elongation factor Ts                                                           | 39555               | 5.24           | 99% identity; CJSA_1119, pI/mw: 5.24 / 39524.98                                    |
| 40      | -6.35              | -5.15              |           | cj 1110c  |              | MCP-type signal transduction protein                                           | 48350.55            | 6              | Pseudogene in IA3902 (CJSA_1052).                                                  |
| 41      | -23.29             | -20.36             |           | cj 1110c  |              | MCP-type signal transduction protein                                           | 48350.55            | 6              | Pseudogene in IA3902 (CJSA_1052).                                                  |
| 42      | 4.12               | 3.73               | CJSA_1232 | Cj1294    | <i>pseC</i>  | C4 aminotransferase specific for PseB product (part of O-linked glycosylation) | 42300.61            | 6.29           | 96% identity; Cj1294, pI/Mw: 6.05 / 42449.81                                       |
| 43      | -2.71              | -3.63              |           | cj 1429c  |              | hypothetical protein (CPS locus)                                               | 35757.83            | 5.25           | Absent in IA3902.                                                                  |
| 44      | 5.94               | 6.1                | CJSA_0966 |           | <i>asd</i>   | aspartate-semialdehyde dehydrogenase                                           | 38376.31            | 5.6            | 99% identical to Cj1023c, which is spot 49 in 11168                                |
| 45      | -10.71             | -7.84              |           | cj 1023c  | <i>asd</i>   | aspartate-semialdehyde dehydrogenase                                           | 38375.37            | 5.89           | 99% identical to CJSA_0966, which is spot 48 in IA3902.                            |
| 46      | -4.13              | -4.97              | CJSA_0137 | cj 0146c  | <i>trxB</i>  | thioredoxin reductase TrxB                                                     | 33118.15            | 5.6            | 100% identity                                                                      |
| 47      | -5.45              | -5.15              | CJSA_0137 | cj 0146c  | <i>trxB</i>  | thioredoxin reductase TrxB                                                     | 33118.15            | 5.6            | 100% identity                                                                      |
| 48      | 4.91               | 5.15               | CJSA_0246 |           | <i>ilvE</i>  | branched-chain amino acid aminotransferase                                     | 33843.81            | 5.93           | 99% identical to cj 0269, which is spot 55 in 11168.                               |
| 49      | 4.68               | 4.22               | CJSA_0246 |           | <i>ilvE</i>  | branched-chain amino acid aminotransferase                                     | 33843.81            | 5.93           | 99% identical to cj 0269, which is spot 55 in 11168.                               |
| 50      | -3.67              | -5.6               | N/A       | N/A       |              |                                                                                |                     |                | no confidence in protein ID                                                        |
| 51      | -7.54              | -4.1               |           | cj 0269   | <i>ilvE</i>  | branched-chain amino acid aminotransferase                                     | 33857.88            | 6.12           | 99% identical to CJSA_0246, which is spots 52/53 in IA3902                         |
| 52      | -5.02              | -5.25              | N/A       | N/A       |              |                                                                                |                     |                | no confidence in protein ID                                                        |
| 53      | -4.07              | -5.05              | CJSA_0134 | cj 0143c  | <i>znuA</i>  | putative periplasmic solute binding protein for ABC transport system           | 34577.72            | 6.71           | 98% identity; CJSA_0134, pI/Mw: 6.54 / 34625.71                                    |
| 54      | -3.67              | -4.79              | CJSA_1159 | cj 1221   | <i>groEL</i> | 60 kD chaperonin (cpn60) GroEL                                                 | 57970.57            | 5.02           | 100% identity                                                                      |
| 55      | -3.08              | -2.64              | N/A       | N/A       |              |                                                                                |                     |                | no confidence in protein ID                                                        |
| 56      | -3.27              | -3.66              | CJSA_1159 | cj 1221   | <i>groEL</i> | 60 kD chaperonin (cpn60) GroEL                                                 | 57970.57            | 5.02           | 100% identity                                                                      |
| 57      | 4.23               | 4.61               | CJSA_0810 | Cj0855    | <i>folD</i>  | folD bifunctional protein (involved in folic acid biosynthesis)                | 30364.44            | 5.61           | 98% identity; Cj0855, pI/Mw: 5.90 / 30349.48                                       |
| 58      | 3.7                | 2.16               | CJSA_1350 | Cj1419c   |              | Putative methyltransferase (part of CPS)                                       | 29704.62            | 5.92           | 100% identity                                                                      |
| 59      | 2.68               | 3.21               | CJSA_0482 |           | <i>purC</i>  | phosphoribosylaminoimidazole-succinocarboxamide synthase PurC                  | 26954.15            | 5.8            |                                                                                    |
| 60      | -5.52              | -5.67              |           | cj 0512   | <i>purC</i>  | phosphoribosylaminoimidazole-succinocarboxamide synthase PurC                  | 26938.19            | 5.8            | 99% identical to Cj0512, which is spot 66 in 11168.                                |
| 61      | 5.47               | 3.11               | CJSA_1350 | Cj1419c   |              | Putative methyltransferase (part of CPS)                                       | 29704.62            | 5.92           | 99% identical to CJSA_0482, which is spot 65 in IA3902.                            |
| 62      | -5.19              | -3.91              | CJSA_1525 | cj 1613c  |              | putative pyridoxamine 5'-phosphate oxidase                                     | 28670.53            | 6.16           | 100% identity                                                                      |
| 63      | -3.04              | -3.16              | CJSA_1351 | cj 1420c  |              | putative methyltransferase (part of CPS)-                                      | 29570.7             | 6.26           | 99% identity; CJSA_1351, pI/Mw: 6.26 / 29558.65                                    |
| 64      | 7.45               | 7.95               | CJSA_0329 | Cj0355c   |              | DNA-binding response regulator                                                 | 25573.26            | 5.09           | 99% identity; Cj0355c, pI/Mw: 5.28 / 25542.29                                      |
| 65      | 31.56              | 37.16              | CJSA_0329 | Cj0355c   |              | DNA-binding response regulator                                                 | 25573.26            | 5.09           | 99% identity; Cj0355c, pI/Mw: 5.28 / 25542.29                                      |
| 66      | 8.66               | 6.78               | CJSA_0329 | Cj0355c   |              | DNA-binding response regulator                                                 | 25573.26            | 5.09           | 99% identity; Cj0355c, pI/Mw: 5.28 / 25542.29                                      |
| 67      | -21.98             | -27.65             | CJSA0329  | cj 0355c  |              | DNA-binding response regulator                                                 | 25573.26            | 5.09           | 99% identity; Cj0355c, pI/Mw: 5.28 / 25542.29                                      |

|    |        |        |           |         |             |                                                     |          |      |                                                 |                                                                                    |
|----|--------|--------|-----------|---------|-------------|-----------------------------------------------------|----------|------|-------------------------------------------------|------------------------------------------------------------------------------------|
| 68 | 2.42   | -2.18  | N/A       | N/A     |             |                                                     |          |      |                                                 | Not identified due to inconsistency between abortion strains relative to NCTC11168 |
| 69 | 2.16   | -3.23  | N/A       | N/A     |             |                                                     |          |      |                                                 | Not identified due to inconsistency between abortion strains relative to NCTC11168 |
| 70 | 3.22   | 4.27   | CJSA_0505 | Cj0538  | <i>oorC</i> | 2-oxoglutarate-acceptor oxidoreductase subunit OorC | 20123.16 | 5.5  | 99% identity; Cj0538, pI/Mw:5.68 / 20097.13     |                                                                                    |
| 71 | -11.96 | -14.41 | CJSA_0308 | cj 0334 | <i>aphC</i> | alkyl hydroperoxide reductase AphC                  | 21947.14 | 5.66 | 99% identity; CJSA_0308, pI/Mw: 5.95 / 22046.27 |                                                                                    |
| 72 | 6.87   | 9.4    | CJSA_0505 | Cj0538  | <i>oorC</i> | 2-oxoglutarate-acceptor oxidoreductase subunit OorC | 20123.16 | 5.5  | 99% identity; Cj0538, pI/Mw:5.68 / 20097.13     |                                                                                    |
| 73 | -2.6   | -2.25  | CJSA_0308 | cj 0334 | <i>aphC</i> | alkyl hydroperoxide reductase AphC                  | 21947.14 | 5.66 | 99% identity; CJSA_0308, pI/Mw: 5.95 / 22046.27 |                                                                                    |
| 74 | -14.49 | -15.74 | CJSA_0308 | cj 0334 | <i>aphC</i> | alkyl hydroperoxide reductase AphC                  | 21947.14 | 5.66 | 99% identity; CJSA_0308, pI/Mw: 5.95 / 22046.27 |                                                                                    |
| 75 | -4.1   | -6.06  | CJSA_0505 | cj 0538 | <i>oorC</i> | 2-oxoglutarate-acceptor oxidoreductase subunit OorC | 20097.13 | 5.68 | 99% identity; CJSA_0505, pI/Mw:5.5/20123.16     |                                                                                    |
| 76 | 10.12  | 9.86   | CJSA_0308 | Cj0334  | <i>aphC</i> | alkyl hydroperoxide reductase AphC                  | 22046.27 | 5.95 | 99 % identity; Cj0334, pI/Mw: 5.66/21947.14     |                                                                                    |
| 77 | 6.43   | 8.28   | CJSA_0308 | Cj0334  | <i>aphC</i> | alkyl hydroperoxide reductase AphC                  | 22046.27 | 5.95 | 99 % identity; Cj0334, pI/Mw:5.66/21947.14      |                                                                                    |
| 78 | 2.32   | -4.17  | N/A       | N/A     |             |                                                     |          |      |                                                 | Not identified due to inconsistency between abortion strains relative to NCTC11168 |
| 79 | -2.8   | -2.75  | CJSA_1570 | cj 1659 | <i>p19</i>  | periplasmic protein p19 (iron transport protein)    | 19642.49 | 5.23 | 100% identity                                   |                                                                                    |
| 80 | -4.77  | -3.06  | N/A       | N/A     |             |                                                     |          |      |                                                 | no confidence in protein ID                                                        |
| 81 | -12.72 | -10.5  | N/A       | N/A     |             |                                                     |          |      |                                                 | no confidence in protein ID                                                        |
| 82 | -3.44  | -5.64  | N/A       | N/A     |             |                                                     |          |      |                                                 | no confidence in protein ID                                                        |
| 83 | -2.87  | -6.04  | N/A       | N/A     |             |                                                     |          |      |                                                 | no confidence in protein ID                                                        |

Note:N/A,no available data due to no confidence in protein ID or inconsistency between abortion strains relative to NCTC11168

**Table S7.** Differentially expressed proteins between IA3902 and NCTC11168 by 2D\_DIGE

|                        | Spots     | NCTC11168 | IA3902    | Genes        | Annotation                                                              | M <sub>r</sub> | pI   | Fold change<br>(2D_DIGE) | Fold Change<br>(Microarray) | Remarks              |
|------------------------|-----------|-----------|-----------|--------------|-------------------------------------------------------------------------|----------------|------|--------------------------|-----------------------------|----------------------|
| Increased<br>in IA3902 | spot38    |           | CJSA0596  |              | prophage Lp2 protein 6                                                  | 40822.58       | 5.09 | 4.37                     | N/A *                       | IA3902 specific gene |
|                        | spot42    | Cj1294    | CJSA_1232 | <i>pseC</i>  | C4 aminotransferase specific for<br>PseB product                        | 42300.61       | 6.29 | 4.12                     | ↑ 1.33*                     | 97% probe identity   |
|                        | spot57    | Cj0855    | CJSA_0810 | <i>folD</i>  | folD bifunctional protein                                               | 30364.44       | 5.61 | 4.23                     | ↓ 2.14*                     | 98% probe identity,  |
|                        | spot58/61 | Cj1419c   | CJSA_1350 |              | Putative methyltransferase                                              | 29704.62       | 5.92 | 3.7                      | ↓ 3.53*                     | 98% probe identity   |
| Decreased<br>in IA3902 | spot9     | Cj0755    | CJSA_0712 | <i>cfrA</i>  | ferric enterobactin uptake receptor<br>CfrA                             | 77554.48       | 5.29 | 10.25                    | ↓ 77.88                     |                      |
|                        | spot16    | Cj1614    | CJSA_1526 | <i>chuA</i>  | haemin uptake system outer<br>membrane receptor ChuA                    | 80940.38       | 6.26 | 6.02                     | ↓ 127.69                    |                      |
|                        | spot37    | Cj0470    | CJSA_0440 | <i>tuf</i>   | translation elongation factor Tu                                        | 43593.62       | 5.11 | 34.99                    | ↓ 1.67*                     | p=0.12,q=0.128       |
|                        | spot39    | Cj1181c   | CJSA_1119 | <i>tsf</i>   | elongation factor Ts                                                    | 39555          | 5.24 | 3.03                     | ↓ 1.80 *                    | p=0.67,q=0.34        |
|                        | spot40/41 | Cj1110c   | CJSA_1052 |              | putative MCP-type signal<br>transduction protein                        | 48350.55       | 6    | 6.35                     | ↓ 25.41                     |                      |
|                        | spot43    | Cj1429c   |           |              | hypothetical protein                                                    | 35757.83       | 5.25 | 2.71                     | ↓ 1.25*                     | p=0.06, q=0.088      |
|                        | spot46/47 | Cj0146c   | CJSA_0137 | <i>trxB</i>  | thioredoxin reductase TrxB                                              | 33118.15       | 5.6  | 4.13                     | ↓ 4.676                     |                      |
|                        | spot53    | Cj0143c   | CJSA_0134 | <i>znuA</i>  | putative periplasmic solute binding<br>protein for ABC transport system | 34577.72       | 6.71 | 4.07                     | ↓ 3.46                      |                      |
|                        | spot54/56 | Cj1221    | CJSA_1159 | <i>groEL</i> | 60 kD chaperonin (cpn60) GroEL                                          | 57970.57       | 5.02 | 3.67                     | ↓ 1.48*                     | p=0.218,q=0.176274   |
|                        | spot62    | Cj1613c   | CJSA_1525 | <i>chuZ</i>  | putative pyridoxamine 5'-phosphate<br>oxidase                           | 28670.53       | 6.16 | 5.19                     | ↓ 9.7                       |                      |
|                        | spot63    | Cj1420c   | CJSA_1351 |              | putative methyltransferase                                              | 29570.7        | 6.26 | 3.04                     | ↓ 1.49*                     | p=0.148,q=0.143      |
|                        | spot79    | Cj1659    | CJSA_1570 | <i>p19</i>   | periplasmic protein p19 (iron<br>transport protein)                     | 19642.49       | 5.23 | 2.8                      | ↓ 3.60                      |                      |

\* Not reliable fold change due to the mismatch of probes to IA3902 or no cutoff (fold change > 2, *q* value < 0.1) qualified value in the microarray data
